# Supplementary material
Source: MDPI journal article supplement (https://www.mdpi.com/2413-8851/6/3/59)

How many trees are planted in African Cities? Expectations and challenges for planning considering current planting trees projects.

#### Supplementary material

Planting tree projects are distributed in all the sub-regions of Africa. Central Africa: Angola, Central African Republic, Democratic Republic of the Congo, Equatorial Guinea, Gabon, Republic of the Congo. West Africa: Ivory Coast, Ghana, Senegal, Nigeria, Liberia, Sierra Leone, Benin. South Africa: as Botswana, Namibia, Zambia, Zimbabwe, Madagascar, and South Africa. East Africa: Rwanda, Kenya, Ethiopia, Tanzania, Comoros, South Sudan, Mauritius Island, Seychelles, Uganda. North Africa: Egypt, Tunisia, Morocco, Algeria, Libya, Sudan. Additional details are provided on investors and funds, trees planted and expected, type of trees, place and timeframe, reasons, tracking policies responsible agency, expected outcomes, and carbon offsets.

**Table S1: Details of trees planting projects in African countries**

| Country | Investors & Funds                  | Trees planted & expected                                                                                                            | Type trees | Place / Timeframe    | Reasons                                                                                                                               | Tracking Policies                                                                                                                | Responsible Agency                                                                            | Expected outcomes                                                                                                            | Carbon offsets                                           | Sources                                                                                                                                                                                                                                                                         |
|---------|------------------------------------|-------------------------------------------------------------------------------------------------------------------------------------|------------|----------------------|---------------------------------------------------------------------------------------------------------------------------------------|----------------------------------------------------------------------------------------------------------------------------------|-----------------------------------------------------------------------------------------------|------------------------------------------------------------------------------------------------------------------------------|----------------------------------------------------------|---------------------------------------------------------------------------------------------------------------------------------------------------------------------------------------------------------------------------------------------------------------------------------|
| Algeria | Government<br>Funds: n.a.          | 43 million trees were expected by March 2020. 25 million trees have been planted in 2019.                                           | n.a.       | Algiers / 2019-2021. | According to the Minister, 10 m2 of green space per inhabitant must be achieved in cities, streets, public spaces, and public bodies. | Tracking policies not mentioned but the planting process took 5 months.                                                          | -Managing Director of Forests.<br>-Minister of Interior and Land Use Planning.                | Many socioenvironmental impacts are expected though not mentioned in this project.                                           | CO2 offsets not estimated, but climate change mentioned. | <a href="https://www.afrik21.africa/en/algeria-43-million-trees-for-final-phase-of-national-reforestation-plan/">https://www.afrik21.africa/en/algeria-43-million-trees-for-final-phase-of-national-reforestation-plan/</a>                                                     |
|         | Not specified<br>Funds: n.a.       | Number of trees unstated but there is a project aimed at transforming the Oued Smar landfill (30 ha) into an urban ecological park. | n.a.       | Algiers / 2013-2030. | -Transforming the biggest nation's dumpsite into an ecological park.                                                                  | Tracking policies were not mentioned but the project was under the supervision of the Ministry of Environment.                   | -Ministry of Environment and Renewable Energies                                               | Create an eco-park for green economy opportunities for urbanites such as green jobs.                                         |                                                          | <a href="http://www.lesechosdalger.com/fermee-2006-decharge-doued-smar-transformee-parc-ecologique-urbain/">http://www.lesechosdalger.com/fermee-2006-decharge-doued-smar-transformee-parc-ecologique-urbain/</a>                                                               |
|         | Government<br>Funds: n.a.          | Number of trees n.a. but this project falls into to the major green plan of Algiers of 2035                                         | n.a.       | Algiers / 2009-2018  | -Transforming Algiers into a green city by 2035                                                                                       | Tracking policies not mentioned but the planting process took 5 months.                                                          | - Algiers Wilaya.<br>- Arte Charpentier Architects<br>- National authorities.                 | 1-Improving the city's mobility for population and businesses.<br>2-Make the city more safe and secure with good governance. |                                                          | <a href="https://theconversation.com/how-much-faith-should-we-have-in-the-algiers-sustainable-city-project-126125">https://theconversation.com/how-much-faith-should-we-have-in-the-algiers-sustainable-city-project-126125</a>                                                 |
| Algeria | Government<br>Funds: n.a.          | More than 2,000 trees planted & 1 million trees expected                                                                            | n.a.       | Baraki/ 2020         | The aim of this tree project is to contribute to the national reforestation plan (NRP).                                               | Tracking policies unmentioned but the project was under the supervision of the Managing Director of Forests and other Ministers. | - Managing Director of Forests.<br>- Ministry of Agriculture.<br>-Ministry of Water resources | -Creation of green jobs for residents.<br>- This project is meant to reduce drought and improve water quantity availability. | CO2 offsets not estimated, but climate change mentioned. | <a href="https://www.aps.dz/economie/112598-lancement-de-l-operation-de-plantation-d-un-million-d-arbres-en-reponse-aux-recents-incendies">https://www.aps.dz/economie/112598-lancement-de-l-operation-de-plantation-d-un-million-d-arbres-en-reponse-aux-recents-incendies</a> |
| Angola  | Government and Institute of Forest | 500 trees planted and                                                                                                               | n.a.       | Luanda / 2018        | Angola was celebrating the World Forest                                                                                               | Tracking policies not mentioned.                                                                                                 | 1-Institute of Forest Development.                                                            | Raising awareness of the people on the importance to                                                                         | CO2 offsets not estimated.                               | <a href="http://www.embaixadadeangola.pt/angola-celebra-dia-">http://www.embaixadadeangola.pt/angola-celebra-dia-</a>                                                                                                                                                           |

|          |                                           |                                                                                                      |                                               |                                     |                                                                                                                                                    |                                                                                                                                                     |                                                                                                                          |                                                                                                                                                                                                                            |                                                                                     |                                                                                                                                                                                                                                                                                                    |
|----------|-------------------------------------------|------------------------------------------------------------------------------------------------------|-----------------------------------------------|-------------------------------------|----------------------------------------------------------------------------------------------------------------------------------------------------|-----------------------------------------------------------------------------------------------------------------------------------------------------|--------------------------------------------------------------------------------------------------------------------------|----------------------------------------------------------------------------------------------------------------------------------------------------------------------------------------------------------------------------|-------------------------------------------------------------------------------------|----------------------------------------------------------------------------------------------------------------------------------------------------------------------------------------------------------------------------------------------------------------------------------------------------|
|          | Development (IDF)<br><br>Funds: n.a.      | others are expected.                                                                                 |                                               |                                     | Day (21 March) by planting several trees in different forests of the country as well as by holding lectures on sustainable use of these resources. |                                                                                                                                                     | (IDF)<br>2-Ministry of Agriculture and Forests.                                                                          | preserve forests starting from cities to villages.                                                                                                                                                                         |                                                                                     | <a href="http://mundial-das-florestas-com-plantacao-de-arvores/">mundial-das-florestas-com-plantacao-de-arvores/</a>                                                                                                                                                                               |
| Angola   | Angola<br><br>Funds: n.a.                 | 300 trees                                                                                            | Different tree species like fruits.           | Rangel (Luanda) / 2019.             | Celebrate national tree day in Luanda                                                                                                              | Unmentioned but supervision by the responsible agencies.                                                                                            | -Luanda city council.<br>- Angolan government<br>- Organization of Angolan Women (OMA)                                   | Make Luanda a green city soon. Improve social ties of the population and unity.                                                                                                                                            | CO2 offsets not estimated.                                                          | <a href="https://www.jornaldeangola.ao/ao/noticias/perto-de-19-mil-arvores-plantadas-em-todo-o-pais/">https://www.jornaldeangola.ao/ao/noticias/perto-de-19-mil-arvores-plantadas-em-todo-o-pais/</a>                                                                                              |
| Angola   | Not mentioned<br><br>Funds: n.a.          | 300 trees planted.                                                                                   | eucalyptus, acacia, and pine seedling species | Andulo / 2020                       | Trees help in the purification and humidity of the air, as they absorb CO2.                                                                        | Unmentioned but supervision by the responsible agencies.                                                                                            | 1-Andulo Municipality.<br>2-Provincial agriculture and forestry office.                                                  | Improve the socioecological conditions of the population through this tree project                                                                                                                                         | CO2 offsets not estimated.                                                          | <a href="https://www.jornaldeangola.ao/ao/noticias/plantacao-de-arvores-em-arterias-da-vila/">https://www.jornaldeangola.ao/ao/noticias/plantacao-de-arvores-em-arterias-da-vila/</a>                                                                                                              |
| Angola   | Not mentioned<br><br>Funds: n.a.          | 1,000 trees planted and 2,000 trees were expected.                                                   | casuarina, acacia, and Ficus                  | Huambo / 2020.                      | This tree project aimed to transform the city of Huambo into an ecological capital.                                                                | Not mentioned but supervision by the responsible agencies.                                                                                          | -Provincial Directorate of Environment.<br>-Huambo Municipality.                                                         | Improve the socioecological conditions of the population by transforming the city into a green city.                                                                                                                       | CO2 offsets not estimated, but climate change mentioned.                            | <a href="https://www.jornaldeangola.ao/ao/noticias/detalhes.php?id=462008">https://www.jornaldeangola.ao/ao/noticias/detalhes.php?id=462008</a>                                                                                                                                                    |
| Benin    | The Beninese government<br><br>Funds n.a. | In total 5850 trees:<br>- 2,100 trees in Parakou,<br>- 1,250 trees in Savé,<br>-2500 trees in Allada | 1.Gmelina<br>2. Milena<br>3. Terminalia       | Parakou, Savé & Allada / 2019-2020. | Planting of trees in different cities of the country is related to the national tree day.                                                          | Tracking policies not mentioned but tracking measures are encouraged by certain mayors of some city councils just like the city council of Parakou. | -The Beninese government<br>- Mayors and municipality authorities<br>- Department of Water and Forest<br>- Fire fighters | The expected social impacts are not mentioned in this project, but the government is aware of these social impacts nursed by this tree project that has the possibility to create jobs direct and indirect in the country. | CO2 offsets not estimated, but CO2 sequestration is the prime goal of this project. | <a href="https://www.youtube.com/watch?v=tEaU_ch8xhY">https://www.youtube.com/watch?v=tEaU_ch8xhY</a><br><br><a href="http://www.africanmagazine.com/2019/06/1er-juin-journee-nationale-de-larbre-au.html">http://www.africanmagazine.com/2019/06/1er-juin-journee-nationale-de-larbre-au.html</a> |
| Botswana | The Botswanan government                  | 300 trees planted                                                                                    | indigenous trees                              | Gaborone / 2013.                    | -Fight the effects of global                                                                                                                       | No tracking policies but supervision                                                                                                                | 1-The Botswana Housing                                                                                                   | 1-Beautify the city and estates.<br>2- Raise awareness                                                                                                                                                                     | CO2 offsets not estimated, but climate                                              | <a href="https://www.mmegi.bw/news/bhc-">https://www.mmegi.bw/news/bhc-</a>                                                                                                                                                                                                                        |

|                          |                                                                                                                         |                                                                                |                                                  |                                       |                                                                                                                                                                                       |                                                                                                                                                   |                                                                                                                                                          |                                                                                                                                                                                         |                                                                            |                                                                                                                                                                                                                                                       |
|--------------------------|-------------------------------------------------------------------------------------------------------------------------|--------------------------------------------------------------------------------|--------------------------------------------------|---------------------------------------|---------------------------------------------------------------------------------------------------------------------------------------------------------------------------------------|---------------------------------------------------------------------------------------------------------------------------------------------------|----------------------------------------------------------------------------------------------------------------------------------------------------------|-----------------------------------------------------------------------------------------------------------------------------------------------------------------------------------------|----------------------------------------------------------------------------|-------------------------------------------------------------------------------------------------------------------------------------------------------------------------------------------------------------------------------------------------------|
|                          | Funds: n.a.                                                                                                             |                                                                                |                                                  |                                       | warming and climate change.<br>- Encouraging residents to plant trees to fight deforestation.                                                                                         | measures implemented by responsible agencies.                                                                                                     | Corporation (BHC)<br>2-Department of Forestry and Range Resources                                                                                        | of the population against climate change.<br>3- Trees provide fresh air and reduce air pollution                                                                                        | change mentioned, but CO2 sequestration is one of the main objectives      | <a href="#">donates-trees-to-its-customers/news#:~:text=SEROWE%3A%20The%20Botswana%20Housing%20Corporation,Mannathoko%20Estate%20over%20the%20weekend.</a>                                                                                            |
| Burkina Faso             | UN Habitat<br><br>Funds: EUR 20,000.                                                                                    | Number of trees not mentioned but instead 6.9 hectare of green spaces planted. | n.a.                                             | <b>Bobo-Dioulasso / 2012-2014.</b>    | - To combat drought and desertification<br>- To reduce climate change effects and global warming.                                                                                     | Tracking policies were not mentioned but supervision was conducted by the UN-Habitat, Bobo Dioulasso municipality.                                | 1- Bobo-Dioulasso municipality.<br>2-UN Habitat.                                                                                                         | 1.Improve the environment of the city.<br>2. Provide green jobs and reduce urban poverty.<br>3. Provide food and social benefits to residents.                                          | 975,923 tons CO2 offset in the future (estimated for next 100 years).      | <a href="https://citeseeerx.ist.psu.edu/viewdoc/download?doi=10.1.1.728.7057&amp;rep=rep1&amp;type=pdf">https://citeseeerx.ist.psu.edu/viewdoc/download?doi=10.1.1.728.7057&amp;rep=rep1&amp;type=pdf</a>                                             |
| Burkina Faso             | 1. International Lions Club<br>2. International Bank for Trade and Industry of Burkina Faso (BICIAB)<br><br>Funds: n.a. | 1,000 trees planted and 80,000 trees are to be planted.                        | Neem and Tamarind mostly and other tree species. | Ouagadougou / 2019-ongoing.           | - To rehabilitate the Ouagadougou green belt.<br>- To reforest degraded lands destroyed by poor urban construction.                                                                   | - Tracking policies are not mentioned but supervision by responsible agencies.                                                                    | - The municipality of Ouagadougou.<br>- The rainbow alliance and the Aurore Club<br>- The National Federation of Nurseries and Gardeners of Burkina Faso | - Potential 8,000 jobs for women and young people through market gardening reinforced by a drip system.<br>- To improve health conditions of both environment and residents.            | CO2 offsets not estimated.                                                 | <a href="https://www.sidwaya.info/blog/2019/08/21/commune-de-ouagadougou-la-ceinture-verte-en-pleine-rehabilitation/">https://www.sidwaya.info/blog/2019/08/21/commune-de-ouagadougou-la-ceinture-verte-en-pleine-rehabilitation/</a>                 |
| Central African Republic | The CAR government &<br><br>Funds n.a.                                                                                  | 12000 trees were planted. 3 million trees are expected.                        | Tectona grandis mostly called Teck               | Pissa (70 km from Bangui) / 2019-2020 | This planting project was conducted during the national tree day created in 1984 by a Presidential decree. The Tree Day is selected depending on the President's schedule since 2016. | Tracking policies not mentioned but the government is determined to make sure that 3 million trees are planted before the next national tree day. | The CAR ministries:<br>-The Ministry of Forestry, Water and Environment.<br>-The Ministry of Finance.                                                    | The expected impacts are not mentioned but the government is aware of the potential of planting trees in the country such as job creation, forest cover increase and poverty reduction. | CO2 offsets not estimated, but tackling climate change is a priority.<br>. | <a href="https://www.acap.cf/Le-president-Faustin-Archange-Touadera-appelle-a-planter-3-millions-d-arbres-en-2020_a9821.html">https://www.acap.cf/Le-president-Faustin-Archange-Touadera-appelle-a-planter-3-millions-d-arbres-en-2020_a9821.html</a> |

|                |                                                                                                                                                        |                                                                                                                                                                                             |                                                                    |                                                                                                                                  |                                                                                                                                                                    |                                                                                                   |                                                                                                                                                       |                                                                                                                                                                                             |                                                                                       |                                                                                                                                                                                                                                                                                                                                                                          |
|----------------|--------------------------------------------------------------------------------------------------------------------------------------------------------|---------------------------------------------------------------------------------------------------------------------------------------------------------------------------------------------|--------------------------------------------------------------------|----------------------------------------------------------------------------------------------------------------------------------|--------------------------------------------------------------------------------------------------------------------------------------------------------------------|---------------------------------------------------------------------------------------------------|-------------------------------------------------------------------------------------------------------------------------------------------------------|---------------------------------------------------------------------------------------------------------------------------------------------------------------------------------------------|---------------------------------------------------------------------------------------|--------------------------------------------------------------------------------------------------------------------------------------------------------------------------------------------------------------------------------------------------------------------------------------------------------------------------------------------------------------------------|
| Congo Republic | 1. Congolese government (300 million euro)<br>2. Donors and international organizations<br><br>Funds: 1.5 billion Euros                                | 160,000 trees planted.                                                                                                                                                                      | n.a.                                                               | Yie (65 km from Brazzaville) / 2011-2021.                                                                                        | To fight against deforestation and soil degradation.                                                                                                               | Tracking policies not mentioned.                                                                  | - Ministry of Forestry.<br>- Donor countries.<br>- International organizations                                                                        | - 50,000 new jobs are expected to be created.                                                                                                                                               | CO2 offsets not estimated, but climate change mentioned.                              | <a href="https://phys.org/news/2011-11-congo-large-scale-tree-planting-programme.html">https://phys.org/news/2011-11-congo-large-scale-tree-planting-programme.html</a>                                                                                                                                                                                                  |
| Cote d'Ivoire  | The Ivorian government<br><br>Funds: 939 million Euros                                                                                                 | - 500 trees planted in 2018 along the road of the airport Port-Bouët.<br><br>- 400,000 trees were planted in Abidjan in 2019. And the rest of 2.1 million trees will be planted nationwide. | n.a.                                                               | - Abidjan 1-2019-2030 for reforestation policies<br>- 2045 is the appointed year for the country to reforest 8 million hectares. | -To fight against desertification.<br>-To recover the 80 percent forest loss caused by both deforestation and desertification.                                     | No tracking policies implemented but the responsible agents will supervise trees planting growth. | - The Ivorian government.<br>- Forestry and Water Resources Ministry.<br>- Didier Drogba foundation (former national football team captain).          | -The expected social impacts are not stated but the government is aware of these social impacts which the tree project can be nursed. Such as creating indirect and direct jobs for youths. | CO2 offsets not estimated, but climate change mentioned, but it is a prime objective. | <a href="http://www.comm-odafrica.com/15-11-2019-un-million-darbres-plantés-aujourd'hui-en-cote-divoire">http://www.comm-odafrica.com/15-11-2019-un-million-darbres-plantés-aujourd'hui-en-cote-divoire</a>                                                                                                                                                              |
| Egypt          | 1. German Academic Exchange Service<br>2. Egyptian government<br>Funds: 260,000 Eur                                                                    | -240 ha of land have been reclaimed for trees planting.<br>-500,000 ha of desert reclaim for afforestation.                                                                                 | - Pine<br>- Eucalyptus<br>- African Mahogany<br>- Neem and others. | Ismailia / 2012-ongoing                                                                                                          | -Afforestation of Egypt which is 96 per cent desert.<br>- Carbon sequestration.                                                                                    | n.a. policies but responsible agencies inspected tree planting sites frequently.                  | - Ministry of Agriculture of Egypt<br>- Scientists from Technical University of Munich (TUM)                                                          | - Generating green income activities to youths of this community.<br>- Capacity building of foresters through efficient forestry                                                            | over 25 million t of CO2 offset expected                                              | <a href="https://www.dw.com/en/sewage-effluent-fights-desertification-in-egypt/a-19318165?maca=en-Twitter-sharing">https://www.dw.com/en/sewage-effluent-fights-desertification-in-egypt/a-19318165?maca=en-Twitter-sharing</a>                                                                                                                                          |
| Egypt          | - Egyptian government.<br>Funds: n.a.<br><br>China and UEA.<br>Funds: \$58 billion for the construction of the city and not only for the tree project. | 350 trees were planted, and 14,000 shrubs were also added. Number of trees not stated but part of the future capital park.                                                                  | -100 different species of trees but not stated.<br><br>n.a.        | - Cairo / 2020-2022.<br><br>- New Administrative Capital near Cairo / 2016-2030.                                                 | - To improve the socio-economic conditions of the population.<br><br>- the creation of this sustainable city is to improve the living standards of the population. | Tracking policies are not mentioned but supervision is under the                                  | - Egyptian Government.<br>-Italian architect and urban planner Stefano Boeri.<br><br>- Egyptian Government.<br>- Ministry of Planning, Monitoring and | -To improve the living standards of the population in the city.<br><br>-Provide a healthy environment through this new sustainable city                                                     | CO2 offsets not estimated.                                                            | <a href="https://travel.earth/africa-first-vertical-woods-in-cairo-egypt/">https://travel.earth/africa-first-vertical-woods-in-cairo-egypt/</a><br><br><a href="https://constructionreviewonline.com/project-timelines/egypts-new-administrative-capital-project-">https://constructionreviewonline.com/project-timelines/egypts-new-administrative-capital-project-</a> |

|          |                                                                                                                                                             |                                                                                                                                                           |      |                                                                                                        |                                                                                                                                                                                                                                                  |                                                                                                           |                                                                                                                            |                                                                                                                                                                                                                                                                                 |                                                             |                                                                                                                                                                                                                                                                                                                                                                                                |
|----------|-------------------------------------------------------------------------------------------------------------------------------------------------------------|-----------------------------------------------------------------------------------------------------------------------------------------------------------|------|--------------------------------------------------------------------------------------------------------|--------------------------------------------------------------------------------------------------------------------------------------------------------------------------------------------------------------------------------------------------|-----------------------------------------------------------------------------------------------------------|----------------------------------------------------------------------------------------------------------------------------|---------------------------------------------------------------------------------------------------------------------------------------------------------------------------------------------------------------------------------------------------------------------------------|-------------------------------------------------------------|------------------------------------------------------------------------------------------------------------------------------------------------------------------------------------------------------------------------------------------------------------------------------------------------------------------------------------------------------------------------------------------------|
|          | Egyptian government.<br><br>Funds: n.a.                                                                                                                     | 12000 trees planted at announcement and 1 million trees were expected to be planted by 2019.                                                              | n.a. | - Cairo / 2019                                                                                         | -To reduce air pollution in Cairo considered as one of the most polluted global cities.<br>- To anticipate water scarcity in Cairo.                                                                                                              | responsible agencies.                                                                                     | Administrative Reform.<br><br>-The Ministry of Environment.<br>-Cairo's authorities                                        | -Beautification of Cairo through urban parks.<br>- For recreational purposes                                                                                                                                                                                                    |                                                             | <a href="https://egyptianstreets.com/2019/11/24/egypt-to-plant-one-million-tree/#:~:text=Egypt%20launched%20a%20new%20initiative,air%20pollution%20in%20the%20country.">timeline-and-what-you-need-to-know/<br/><br/>https://egyptianstreets.com/2019/11/24/egypt-to-plant-one-million-tree/#:~:text=Egypt%20launched%20a%20new%20initiative,air%20pollution%20in%20the%20country.</a>         |
| Eritrea  | 1- Eritrean government<br>2-Massawa authorities                                                                                                             | Number of trees unknown                                                                                                                                   | n.a. | Massawa / 2020                                                                                         | -Substituting salty soil by fertile soil.<br>-Proper fertilization as well as planting big tree seedlings and flowers                                                                                                                            | Tracking policies not mentioned but supervision under the responsible agencies.                           | -Mr. Solomon Araya, head of forestation unit.<br>-Forestation unit                                                         | -Improve the wellbeing of the population through the fertilization of soils that will boost big tree seedlings and flowers in the city.                                                                                                                                         | CO2 sequestration is considered although not estimated.     | <a href="https://shabait.com/2020/02/03/tree-planting-popular-campaign-in-massawa/">https://shabait.com/2020/02/03/tree-planting-popular-campaign-in-massawa/</a>                                                                                                                                                                                                                              |
| Ethiopia | Ethiopian government.<br><br>Funds: n.a.<br><br>1- African Development Bank (AfDB).<br>2-Urban Municipal Development Fund (UMDF).<br><br>Funds: \$1 billion | 353,633,660 trees planted out of 4 billion.<br><br>Number of trees not mentioned but it aims at creating urban park for the "Beautifying Sheger project". | n.a. | Nationwide starting from Addis Ababa / May-October 2019 (2019-2024).<br><br>Addis Ababa / 2019-ongoing | To counteract the effects of deforestation and climate change in the drought-prone country.<br><br>-This project aims at making the capital city a touristic destination. Enhancing the well-being of city dwellers by mitigating river flooding | Tracking policies n.a. but government supervised this project under the leadership of the Prime Minister. | 1.Ethiopian Government.<br><br>2. Rotary Ethiopia.<br><br>3- Prime Minister of Ethiopia<br><br>4- Addis Ababa municipality | To increase Ethiopia forest coverage which was just 4 percent in 2000 down from the 35 percent in the 19th century.<br><br>- Improve the socioeconomic conditions of the population which will improve their wellbeing.<br><br>- Boost the economy of the city through tourism. | CO2 offsets not estimated but climate change is a priority. | <a href="https://edition.cnn.com/2019/07/29/africa/ethiopia-plants-350-million-trees-intl-hnk/index.html">https://edition.cnn.com/2019/07/29/africa/ethiopia-plants-350-million-trees-intl-hnk/index.html</a><br><br><a href="https://traveltomorrow.com/beautifyin-g-addis-ababa-as-an-urban-tourism-site/">https://traveltomorrow.com/beautifyin-g-addis-ababa-as-an-urban-tourism-site/</a> |
| Ghana    | The Ghanaian government.                                                                                                                                    | 10 million trees; 100,000 trees in the Accra                                                                                                              | n.a. | - Accra<br>- Nationwide                                                                                | To increase climate resilience                                                                                                                                                                                                                   | Policies n.a. but government is                                                                           | Ministry of Environment, Science,                                                                                          | Not specified but the government affirmed through his                                                                                                                                                                                                                           | CO2 offsets not estimated, but the project                  | <a href="https://ama.gov.gh/news-details.php?n=NXE">https://ama.gov.gh/news-details.php?n=NXE</a>                                                                                                                                                                                                                                                                                              |

|         |                                                                                             |                                                                                 |                                                                                                 |                                                                                                                             |                                                                                                                                                                                                                                      |                                                                                                                                                                                                 |                                                                                                                                                                                                                                      |                                                                                                                                                                                                                                                                                                                                   |                                                           |                                                                                                                                                                                                                                                                                                                                                        |
|---------|---------------------------------------------------------------------------------------------|---------------------------------------------------------------------------------|-------------------------------------------------------------------------------------------------|-----------------------------------------------------------------------------------------------------------------------------|--------------------------------------------------------------------------------------------------------------------------------------------------------------------------------------------------------------------------------------|-------------------------------------------------------------------------------------------------------------------------------------------------------------------------------------------------|--------------------------------------------------------------------------------------------------------------------------------------------------------------------------------------------------------------------------------------|-----------------------------------------------------------------------------------------------------------------------------------------------------------------------------------------------------------------------------------------------------------------------------------------------------------------------------------|-----------------------------------------------------------|--------------------------------------------------------------------------------------------------------------------------------------------------------------------------------------------------------------------------------------------------------------------------------------------------------------------------------------------------------|
|         | Funds: n.a.                                                                                 | Metropolitan Assembly (AMA) and the rest of the country                         |                                                                                                 | Starting from 2019.                                                                                                         | towards achieving the sustainable development agenda.                                                                                                                                                                                | responsible for this project.                                                                                                                                                                   | Technology, and Innovation                                                                                                                                                                                                           | Minister of Environment that nearly 20,000 jobs have been offered to people to plant trees.                                                                                                                                                                                                                                       | is meant to fight climate change via carbon sequestration | <a href="https://www.kenyaforestfund.org/2019/01/24/2NiU0NXJycTQwNXM1NzI2cjdwNDZzNHA2MDM3bm40cEwbiZucQ==">2NiU0NXJycTQwNXM1NzI2cjdwNDZzNHA2MDM3bm40cEwbiZucQ==</a>                                                                                                                                                                                     |
| Kenya   | Kenyan government<br><br>Funds: n.a.<br><br>Global Forest Fund.<br><br>Funds: n.a.<br><br>. | 1.8 billion trees to be planted.<br><br>10, 000 trees expected to be planted    | n.a.<br><br>Mango trees and other trees suitable to winds and ecological conditions of Nairobi. | Starting from Nairobi and to other cities and nationwide / 2018-2022.<br><br>Starting from Nairobi and Kiambu. (2020-2023). | This project is initiated to comply to the Paris Agreement and enable Kenya fight climate change.<br><br>Aims to increase the awareness among students on the importance of trees, promote tree planting in schools and communities. | Policies were not stated but the government would supervise this massive tree planting season nationwide.<br><br>Tracking policies are not mentioned but the supervised the Global Forest Fund. | Kenyan Ministries of Environment and Education.<br><br>1-1500 students and 50 teachers from Nairobi Academy and Githiga Boys High School.<br>2-Global Forest Fund (Danish NGO).<br>3-Foundation for Environmental Education (Kenya). | The main social impact is to create awareness in the minds of pupils and students about environmental protection and incite their urge to fight climate change.<br><br>1-Encourage environmental education and capacity building for students.<br>2- Trained students and teachers in nursery management and long-term tree care. | CO2 offsets not estimated, but it is a goal.              | <a href="https://www.standardmedia.co.ke/article/2001280182/opinion-make-kenyans-own-president-uhuru-s-tree-planting-initiative">https://www.standardmedia.co.ke/article/2001280182/opinion-make-kenyans-own-president-uhuru-s-tree-planting-initiative</a><br><br><a href="https://www.gff.global/our-stories">https://www.gff.global/our-stories</a> |
| Kenya   | Kenya Red Cross Society (KRCS).<br>UNHCR<br><br>Funds: n.a.                                 | 12,500 trees planted in 2016 and about 52,000 trees are expected to be planted. | indigenous tree seedlings                                                                       | Dadaab / 2016-2020                                                                                                          | -To reduce desertification and climate change effects.                                                                                                                                                                               | Tracking policies are not mentioned but supervision under KRCS, UNHCR and others.                                                                                                               | 1- Kenya Red Cross Society (KRCS).<br>2- UNHCR<br>3- Ministry of Environment and Natural Resources (MENR)                                                                                                                            | To educate, mobilise and create awareness around environmental issues especially tree growing.                                                                                                                                                                                                                                    | CO2 offsets not estimated. but it is an intended target.  | <a href="https://slidelegend.com/press-release-kenya-red-cross-59d317981723dd34305e5bc1.html">https://slidelegend.com/press-release-kenya-red-cross-59d317981723dd34305e5bc1.html</a>                                                                                                                                                                  |
| Lesotho | Lesotho Government.<br><br>Funds: n.a.                                                      | Around 200-300 trees were expected to be planted.                               | 1. Wood Trees 2. Fruit Trees                                                                    | Maseru / 2020                                                                                                               | -Reforestation of depleted forest areas of the city of Maseru and nationwide.<br>- Reduce moisture and                                                                                                                               | No tracking policies were unmentioned, but the Ministry of Forest coordinates the trees planting                                                                                                | Ministry of Forestry.<br>Ministry of Communications, Science and Technology.                                                                                                                                                         | Trees provided many socioeconomic benefits such as food supply and medicine for population.                                                                                                                                                                                                                                       | CO2 sequestration is a targeted goal although unknown.    | <a href="https://www.maseru.metro.com/news/business/trees-should-be-planted-here-is-why/">https://www.maseru.metro.com/news/business/trees-should-be-planted-here-is-why/</a>                                                                                                                                                                          |

|            |                                                                                                                                        |                                                                                                        |                                                                   |                                                                    |                                                                                                                                                                           |                                                                                                                                                               |                                                                                                 |                                                                                                                                                                                                                                                                                                       |                                                                            |                                                                                                                                                                                                                                                                                                                                      |
|------------|----------------------------------------------------------------------------------------------------------------------------------------|--------------------------------------------------------------------------------------------------------|-------------------------------------------------------------------|--------------------------------------------------------------------|---------------------------------------------------------------------------------------------------------------------------------------------------------------------------|---------------------------------------------------------------------------------------------------------------------------------------------------------------|-------------------------------------------------------------------------------------------------|-------------------------------------------------------------------------------------------------------------------------------------------------------------------------------------------------------------------------------------------------------------------------------------------------------|----------------------------------------------------------------------------|--------------------------------------------------------------------------------------------------------------------------------------------------------------------------------------------------------------------------------------------------------------------------------------------------------------------------------------|
|            |                                                                                                                                        |                                                                                                        |                                                                   |                                                                    | swampy areas of the country as trees can suck water from them                                                                                                             | process nationwide.                                                                                                                                           |                                                                                                 |                                                                                                                                                                                                                                                                                                       |                                                                            |                                                                                                                                                                                                                                                                                                                                      |
| Liberia    | Monrovia City Corporation.<br><br>Funds: n.a.                                                                                          | 10,000 trees planted                                                                                   | Palm and coconut trees                                            | Monrovia city specifically Tubman Boulevard / 2018-2021            | To fight climate change, and desertification in the country. Also, to beautify the capital city and improve air quality and reduce floods within the city.                | Not mentioned                                                                                                                                                 | Monrovia City Corporation (MCC).                                                                | To improve the wellbeing of residents of Monrovia by beautifying the city.                                                                                                                                                                                                                            | CO2 sequestration is a targeted goal although no estimates are mentioned.  | <a href="https://allafrica.com/stories/201910140214.html">https://allafrica.com/stories/201910140214.html</a>                                                                                                                                                                                                                        |
| Madagascar | The government<br><br>Funds: n.a.                                                                                                      | -1 million trees planted in a span of few hours.<br>-60 million trees expected to be planted.          | - Acacia<br>- Eucalyptus<br>- fruit trees and various spice trees | Antananarivo (Ankazobe district) / January - April 2020            | The government has the challenge of making Madagascar a green island again.                                                                                               | Policies n.a. but tracking of this tree project supervised by the Ministry of Environment.                                                                    | Ministry of Environnement & Groupe d'Etude et de Recherche sur les Primates (GERP)              | - Job creation. In Ankazobe, there is a plan to recruit 50 people to monitor the samplings because the area is at risk from forest fires that could wipe out the grains planted.<br>-Involving local communities is indispensable not just in planting trees but in monitoring and safeguarding them. | CO2 offsets not estimated, but it is a goal of this reforestation project. | <a href="https://news.mongabay.com/2020/01/madagascar-launches-massive-planting-drive-eyes-60-million-trees/">https://news.mongabay.com/2020/01/madagascar-launches-massive-planting-drive-eyes-60-million-trees/</a>                                                                                                                |
| Malawi     | 1 The government<br>2 The Lilongwe City Authorities<br>3 Japan (JICA).<br>Funds:<br>1 00, 000 USD<br><br>Investors n.a.<br>Funds: n.a. | 1 million trees<br><br><br><br><br><br>62 million trees already planted and more than 60 million trees | indigenous tree species                                           | Lilongwe city / 2017-2018<br><br><br><br>Lilongwe city / 2020-2021 | To reforest the Dzalanyama Forest Reserve which have been degraded due to illegal logging, charcoal use and climate change.<br><br>To combat deforestation and bush fires | Tracking policies n.a. but supervised by the Ministry of Forestry and other responsible agencies.<br><br>No tracking policies stated but this tree project is | -Ministry of Forestry<br><br>- Lilongwe City Authority<br><br>- JICA<br><br>-Malawian Authority | 1 Employment creation for youths by providing green jobs.<br>2 Training 100 youths leaders trained in environmental management.<br>3 Planting small trees nurses in schools,                                                                                                                          | CO2 offsets not estimated.                                                 | <a href="https://tree-nation.com/projects/dzalanyama-forest-tree-planting-pro/about">https://tree-nation.com/projects/dzalanyama-forest-tree-planting-pro/about</a><br><br><a href="https://malawidevelopment.wordpress.com/2020/12/23/malawi-government-">https://malawidevelopment.wordpress.com/2020/12/23/malawi-government-</a> |

|           |                                                                                                                               |                                                                                                          |                         |                                                     |                                                                                                                                                                                                                                                                        |                                                                                  |                                                                                                                                                                                                                                                                |                                                                                                                                                                                                                                                                  |                                                                 |                                                                                                                                                                                                                                                                                                                                                                                                                                                                                                                                                                                                                                           |
|-----------|-------------------------------------------------------------------------------------------------------------------------------|----------------------------------------------------------------------------------------------------------|-------------------------|-----------------------------------------------------|------------------------------------------------------------------------------------------------------------------------------------------------------------------------------------------------------------------------------------------------------------------------|----------------------------------------------------------------------------------|----------------------------------------------------------------------------------------------------------------------------------------------------------------------------------------------------------------------------------------------------------------|------------------------------------------------------------------------------------------------------------------------------------------------------------------------------------------------------------------------------------------------------------------|-----------------------------------------------------------------|-------------------------------------------------------------------------------------------------------------------------------------------------------------------------------------------------------------------------------------------------------------------------------------------------------------------------------------------------------------------------------------------------------------------------------------------------------------------------------------------------------------------------------------------------------------------------------------------------------------------------------------------|
|           |                                                                                                                               | expected to be planted.                                                                                  |                         |                                                     |                                                                                                                                                                                                                                                                        | supervised by the Malawian government                                            |                                                                                                                                                                                                                                                                | communities, and district.<br><br>Restore degraded forest landscapes and providesocioeconomic benefits to population in the long term.                                                                                                                           |                                                                 | <a href="#">plans-to-plant-more-than-60-million-trees-in-4-months/</a>                                                                                                                                                                                                                                                                                                                                                                                                                                                                                                                                                                    |
| Mali      | <p>- The Malian government<br/>- Ibrahim Yara private company.</p> <p>Funds: n.a.</p> <p>Malian government<br/>Funds: n.a</p> | <p>18 000 and 2 000 trees already planted. 22 million trees will be planted</p> <p>150 trees planted</p> | <p>n.a.</p> <p>n.a.</p> | <p>Bamako / 2019-2023</p> <p>Bamako / 2019</p>      | <p>Planting trees to resist climate change is the main idea behind these reforestation campaigns in Mali. The main idea is to transform Bamako into a green city.</p> <p>-To fight deforestation.<br/>- To reduce urban heat waves .<br/>To combat climate change.</p> | <p>Policies n.a. but tracking the growth of trees is done by the government.</p> | <p>-«Save le fleuve Niger»<br/>- Ibrahim Yara company<br/>- Malian government<br/>- Gilets Verts</p> <p>Malian Network of Professional Women in Water and Sanitation (REMAFPEA)<br/>-Bamako city authorities.<br/>- National Water and Forests Directorate</p> | <p>Expected social impacts are not mentioned but the targeted goal is to improve the living conditions of the residents of Bamako by fighting climate change and desertification in the city.</p> <p>Improve the socioeconomic conditions of the population.</p> | <p>CO2 offsets not estimated, but climate change mentioned.</p> | <p><a href="https://maliactu.net/mali-campagne-de-reboisement-a-bamako-18-000-arbres-plantés-dans-les-6-communes/">https://maliactu.net/mali-campagne-de-reboisement-a-bamako-18-000-arbres-plantés-dans-les-6-communes/</a></p> <p><a href="https://www.afwa-hq.org/index.php/en/news-women-professional/item/902-the-professional-women-in-water-and-sanitation-of-mali-devote-a-morning-to-organize-a-tree-planting-event-in-bamako">https://www.afwa-hq.org/index.php/en/news-women-professional/item/902-the-professional-women-in-water-and-sanitation-of-mali-devote-a-morning-to-organize-a-tree-planting-event-in-bamako</a></p> |
| Mauritius | <p>Rotary Club of Rose Belle.</p> <p>Funds: n.a.</p>                                                                          | 1 million trees                                                                                          | n.a.                    | Starting from Port Louis and nationwide / 2018-2030 | Planting trees to contribute toward environmental protection.                                                                                                                                                                                                          | Policies n.a. but monitoring measures done on monthly basis.                     | Rotary Club                                                                                                                                                                                                                                                    | <p>-Peace promotion<br/>-Boost economy<br/>-Job creation and business opportunities.</p>                                                                                                                                                                         | CO2 offsets not estimated, but climate change mentioned.        | <a href="https://www.esrag.org/one-million-trees-project-mauritius-island">https://www.esrag.org/one-million-trees-project-mauritius-island</a>                                                                                                                                                                                                                                                                                                                                                                                                                                                                                           |
| Morocco   | Moroccan government                                                                                                           | 3 million trees planted. 800,000 trees were                                                              | Argan tree              | Starting from Marrakesh and                         | Planting trees along the roads of main cities                                                                                                                                                                                                                          | n.a. but the planting process was expected to                                    | 1-Moroccan Highways Authority                                                                                                                                                                                                                                  | Not mentioned but the Moroccan Highways Authority                                                                                                                                                                                                                | CO2 offsets not estimated, but climate                          | <a href="https://news.mongabay.com/2016/11/morocco-plants-">https://news.mongabay.com/2016/11/morocco-plants-</a>                                                                                                                                                                                                                                                                                                                                                                                                                                                                                                                         |

|            |                                                                                                                       |                                                               |                   |                                                  |                                                                                                                                                                                       |                                                                                   |                                                                                                                               |                                                                                                                                                 |                                                                                                          |                                                                                                                                                                                                                                                                                                                                                                                          |
|------------|-----------------------------------------------------------------------------------------------------------------------|---------------------------------------------------------------|-------------------|--------------------------------------------------|---------------------------------------------------------------------------------------------------------------------------------------------------------------------------------------|-----------------------------------------------------------------------------------|-------------------------------------------------------------------------------------------------------------------------------|-------------------------------------------------------------------------------------------------------------------------------------------------|----------------------------------------------------------------------------------------------------------|------------------------------------------------------------------------------------------------------------------------------------------------------------------------------------------------------------------------------------------------------------------------------------------------------------------------------------------------------------------------------------------|
|            | Funds: n.a. but the government claimed millions have been invested                                                    | expected to be planted before the end of 2017                 |                   | to other cities nationwide / 2017                | like Marrakesh, with the aim to achieve carbon sequestration.                                                                                                                         | end before 2017                                                                   | 2-Department of Agriculture                                                                                                   | claimed this project will bring many social impacts including the wellbeing of urban dwellers.                                                  | change mentioned.                                                                                        | <a href="#">millions-of-trees-along-roads-to-fight-climate-change/</a>                                                                                                                                                                                                                                                                                                                   |
| Morocco    | Moroccan government<br><br>Funds: n.a.                                                                                | 1 million trees to be planted                                 | n.a.              | Starting from Jbilat and later nationwide / 2016 | To fight deforestation and desertification in cities and aligned cities and the nation with the COP 22 negotiations during that time                                                  | n.a.but supervision done under the leadership of the King Mohammed VI of Morocco. | High Commission for Water and Forests and the Fight against Desertification (HCEFLCD).<br>- Moroccan authorities              | 1. Planting trees in day will lead to the improvement of socio-environmental conditions of residents.                                           | CO2 offsets not estimated, but climate change mentioned.                                                 | <a href="https://mapecology.ma/initiatives/cop22-lancement-de-linitiative-nationale-de-plantation-de-plus-dun-million-darbres-seule-journee/">https://mapecology.ma/initiatives/cop22-lancement-de-linitiative-nationale-de-plantation-de-plus-dun-million-darbres-seule-journee/</a>                                                                                                    |
| Morocco    | 1. Moroccan government.<br>2. Republic of Korea Forest Service<br>3. UN Environment (UNEP) provided technical support | About 635 hectares of trees were planted                      | n.a.              | Ouarzazate / 2012-2017                           | To build a green belt around the city to act as a protective buffer between the city and the desert.<br>To create recreation areas for citizens which are healthy for the population. | n.a but under the supervision of the responsible agencies.                        | -Morocco's High Commissariat for Water and Forests.<br><br>-UNEP<br>- Republic of Korea Forest Service<br>- local authorities | Improve the wellbeing of the population by creating recreational areas and limiting desertification effects on people like dust.                | Carbon sequestration is not mentioned in this tree project but it is highly considered by the government | <a href="https://www.waterbriefingglobal.org/from-wastewater-to-oasis-greening-the-desert-in-morocco/">https://www.waterbriefingglobal.org/from-wastewater-to-oasis-greening-the-desert-in-morocco/</a><br><a href="https://www.unep.org/news-and-stories/story/waste-water-oasis-greening-desert-0">https://www.unep.org/news-and-stories/story/waste-water-oasis-greening-desert-0</a> |
| Mozambique | TreeSisters NGO                                                                                                       | 55,000 trees already planted and 750,000 trees to be planted. | Mangroves         | Katembe & Madjuva near Maputo / 2018-2020        | The rapid depletion of mangroves caused by human-induced activities building materials, firewood, fencing, fish traps                                                                 | No Tracking policies mentioned but supervision done by responsible agencies       | TreeSisters NGO<br>-Mozambique authority                                                                                      | 1. Mangroves can create provide shelter for population and protect biodiversity.<br>2. Employment creation.<br>3. Agroforestry for food supply. | Carbon sequestration is not mentioned in this tree project but it is highly considered in this project.  | <a href="https://treesisters.org/grow-forests/bela-vista-mozambique/our-mangrove-planting-project-in-mozambique">https://treesisters.org/grow-forests/bela-vista-mozambique/our-mangrove-planting-project-in-mozambique</a>                                                                                                                                                              |
| Namibia    | 1-UN-Nambia.<br>2- Ministry of Agriculture, Water and Forestry.                                                       | 500 trees planted.                                            | -Indigenous trees | Windhoek / 2019                                  | Investment of planting trees in the surrounding will have long lasting benefits                                                                                                       | n.a. but measures are implemented by responsible agencies.                        | 1-UN-Nambia<br>2-Ministry of Agriculture, Water and Forestry.                                                                 | The project is further set to improve the socio-economic conditions of rural                                                                    | CO2 sequestration is not mentioned but this project is                                                   | <a href="https://namibia.un.org/en/25633-tree-planting-mark-un-day">https://namibia.un.org/en/25633-tree-planting-mark-un-day</a>                                                                                                                                                                                                                                                        |



|         |                                                                     |                                                                                                          |                                                                                  |                                                  |                                                                                                                                                                  |                                                                                     |                                                                                                                                                                                                  |                                                                                                                                                                                                                                       |                                                                              |                                                                                                                                                                                                                                                                                                                                                                                                                                                                                                                                                                                                       |
|---------|---------------------------------------------------------------------|----------------------------------------------------------------------------------------------------------|----------------------------------------------------------------------------------|--------------------------------------------------|------------------------------------------------------------------------------------------------------------------------------------------------------------------|-------------------------------------------------------------------------------------|--------------------------------------------------------------------------------------------------------------------------------------------------------------------------------------------------|---------------------------------------------------------------------------------------------------------------------------------------------------------------------------------------------------------------------------------------|------------------------------------------------------------------------------|-------------------------------------------------------------------------------------------------------------------------------------------------------------------------------------------------------------------------------------------------------------------------------------------------------------------------------------------------------------------------------------------------------------------------------------------------------------------------------------------------------------------------------------------------------------------------------------------------------|
|         |                                                                     |                                                                                                          |                                                                                  |                                                  | of it forest cover.<br>- Contribute largely to the Great Green Wall project.                                                                                     |                                                                                     |                                                                                                                                                                                                  | -25 million jobs will be created for youths                                                                                                                                                                                           |                                                                              | <a href="#">-tells-un-environmental-summit-that-nigeria-will-plant-25m-trees-to-combat-climate-change/</a>                                                                                                                                                                                                                                                                                                                                                                                                                                                                                            |
| Nigeria | Sokoto authorities<br><br>Funds: n.a.                               | 1 million trees planted                                                                                  | moringa oleifera, baobab, mango, eucalyptus, cashew, neem, pawpaw, and tamarind. | Sokoto / 2016                                    | -To reduce desertification and drought.<br>-To fight climate change and global warming                                                                           | Tracking policies are not mentioned but supervision under the responsible agencies. | 1-Governor of Sokoto State<br>2-Sokoto authorities.<br>3-local community groups                                                                                                                  | Improve the socioeconomic conditions of the population by creating green for youths and women specifically.                                                                                                                           | CO2 sequestration unknown but this project is meant to fight climate change. | <a href="https://www.environewsigeria.com/desertification-sokoto-plant-1-million-trees/">https://www.environewsigeria.com/desertification-sokoto-plant-1-million-trees/</a>                                                                                                                                                                                                                                                                                                                                                                                                                           |
| Nigeria | Lagos authorities<br><br>Funds: n.a.                                | Number of trees n.a. but this green project is 5-year tree planting in Lagos.<br><br>Number of trees n.a | n.a.                                                                             | Lagos / 2015-2020<br><br>Lagos / 2014-2024       | -To mitigate climate change.<br>-Encourage carbon sequestration through trees planting.<br><br>-Transform the dumping site into a large green space for golfing. | Tracking policies are unstated but supervision under the responsible agencies       | Nigerian government<br>The Lagos State Parks and Gardens Agency (LASPARK).<br>Managing Director of LASPARK<br>-The Lagos state wastes management authority (LAWMA).<br>- Lagos state authorities | -To boost the socioeconomic life of the city, state and its residents through creation of green jobs.<br>-Improve the health of residents by creating better environmental conditions.<br>Encourage ecotourism and boost the economy. | CO2 sequestration n.a.<br><br>Reduce CO2 emissions from this dumping site.   | <a href="https://sundiatapo.st.com/laspark-develops-5-year-master-plan-for-tree-planting/">https://sundiatapo.st.com/laspark-develops-5-year-master-plan-for-tree-planting/</a><br><br><a href="https://www.thecable.ng/olusosun-landfill-become-golf-course">https://www.thecable.ng/olusosun-landfill-become-golf-course</a><br><a href="https://www.premiumtimesng.com/regional/ssouth-west/458490-again-lagos-govt-announces-plans-to-close-largest-dumpsite.html">https://www.premiumtimesng.com/regional/ssouth-west/458490-again-lagos-govt-announces-plans-to-close-largest-dumpsite.html</a> |
| Rwanda  | Rwandan government<br><br>Funds: 4.4 billion Rwf (4.704.752,80 USD) | 43,589 hectares of trees were expected to be planted in the next 6 months.                               | n.a.                                                                             | - Kigali Mount Rebero (Kicukiro District) / 2019 | - To increase forest coverage to 30% (714,102 ha as country is suffering from deforestation.                                                                     | n.a. but the government through ministries supervise massive tree planting.         | The government; the Prime Ministry, Ministry of Environment, Kicukiro District.                                                                                                                  | Impacts are not mentioned but the government affirmed through the Minister of Environment that this project has positive social outcomes such as health, air                                                                          | n.a. but it is a targeted goal by the government                             | <a href="https://www.ktpress.rw/2018/10/rwanda-to-plant-43000-hectares-of-trees-in-six-months/">https://www.ktpress.rw/2018/10/rwanda-to-plant-43000-hectares-of-trees-in-six-months/</a>                                                                                                                                                                                                                                                                                                                                                                                                             |

|              |                                                                                                            |                                                                          |                                                                                                         |                                                                       |                                                                                                                                                                                                                                                                          |                                                                                                                                                          |                                                                                                                                               |                                                                                                                                                                                                                                                                                                                              |                                                                                                                                                                                                                                 |                                                                                                                                                                                                                                                                                                                                                                                                            |
|--------------|------------------------------------------------------------------------------------------------------------|--------------------------------------------------------------------------|---------------------------------------------------------------------------------------------------------|-----------------------------------------------------------------------|--------------------------------------------------------------------------------------------------------------------------------------------------------------------------------------------------------------------------------------------------------------------------|----------------------------------------------------------------------------------------------------------------------------------------------------------|-----------------------------------------------------------------------------------------------------------------------------------------------|------------------------------------------------------------------------------------------------------------------------------------------------------------------------------------------------------------------------------------------------------------------------------------------------------------------------------|---------------------------------------------------------------------------------------------------------------------------------------------------------------------------------------------------------------------------------|------------------------------------------------------------------------------------------------------------------------------------------------------------------------------------------------------------------------------------------------------------------------------------------------------------------------------------------------------------------------------------------------------------|
|              |                                                                                                            |                                                                          |                                                                                                         |                                                                       |                                                                                                                                                                                                                                                                          |                                                                                                                                                          |                                                                                                                                               | purification and creating awareness to protect the environment by citizens.                                                                                                                                                                                                                                                  |                                                                                                                                                                                                                                 |                                                                                                                                                                                                                                                                                                                                                                                                            |
| Senegal      | European Union (EU)<br><br>Funds: n.a.<br><br><br><br><br><br><br>Senegalese government<br><br>Funds: n.a. | 1,300 trees will be planted.<br><br><br><br><br><br><br>10 ha of forests | n.a.<br><br><br><br><br><br><br>n.a. but the trees planted for an urban forest park which covers 10 ha. | Dakar / 2020-2035<br><br><br><br><br><br><br>Dakar / 2020-2035        | -To fight climate change and urban heat waves<br>- <b>Improve socioenvironmental conditions of the population</b><br><br>-The park will be a relaxation area, consisting of woodland, bocage, marshes and playgrounds.<br><br>-- The promotion of floristic biodiversity | n.a. but tracking measures implemented by responsible agencies<br><br><br><br><br><br><br>n.a. but tracking measures implemented by responsible agencies | - Senegalese government.<br>- Ecolibri<br>-Dakar city council.<br><br><br><br><br><br><br>- Senegalese government.<br>- Senegalese President. | - Improve the socioeconomic conditions of the population.<br>- Improve the health of the environment through trees planting.<br><br><br><br><br><br><br>- 1. To improve the wellbeing of the population of Dakar through recreational activities.<br>-2. To boost tourism and encourage eco-tourism in Dakar and nationwide. | The project aims to restore the forest cover of the city of Dakar, increase its carbon dioxide (CO2) storage capacity.<br><br><br><br><br><br><br>CO2 emissions not available but the project is meant to fight climate change. | <a href="https://www.afrik21.africa/en/senegal-ecolibri-to-plant-an-urban-forest-of-1300-trees-in-dakar/">https://www.afrik21.africa/en/senegal-ecolibri-to-plant-an-urban-forest-of-1300-trees-in-dakar/</a><br><br><a href="https://www.afrik21.africa/en/senegal-10-hectare-forest-park-to-be-set-up-in-dakar/">https://www.afrik21.africa/en/senegal-10-hectare-forest-park-to-be-set-up-in-dakar/</a> |
| Seychelles   | Adaptation Fund<br>Funds: n.a.                                                                             | 4,000 trees to be planted.                                               | Indigenous trees species like (Mimusops seychellarum )                                                  | 1-Victoria (2-Val D'en Dor in Baie Lazare, Caiman Anse Boileau / 2018 | -Is to help people to adapt to future climate change<br>- Rehabilitate and protect forest                                                                                                                                                                                | Policies n.a. but the responsible agents will supervise trees planting growth.                                                                           | - The Adaptation Fund<br>- The government.                                                                                                    | Expected social impacts are not mentioned but the targeted goal is to improve the living conditions of the people of Seychelles.                                                                                                                                                                                             | n.a. though carbon offsets are relevant for this project.                                                                                                                                                                       | <a href="https://www.adaptation-fund.org/ie_kp_project/ecosystem-based-adaptation-to-climate-change-in-seychelles/">https://www.adaptation-fund.org/ie_kp_project/ecosystem-based-adaptation-to-climate-change-in-seychelles/</a>                                                                                                                                                                          |
| Sierra Leone | Freetown city council &<br><br>Funds: n.a.                                                                 | Over 12,000 trees were expected to be planted.                           | n.a.                                                                                                    | Freetown / 2019-2023                                                  | The main aim of this initiative is to increase the rate of vegetation to cover by 50% in the city within the next four 4 years during the world's                                                                                                                        | Policies are not mentioned but the city council is responsible for supervising trees planting for the next 4 years.                                      | - The Freetown city council<br>- Catholic Relief Services (CRS)<br>- Trees For Prosperity, Tacugama Chimpanzee Sanctuary                      | Impacts are not clearly stated but the Mayor of Freetown is aware of the potential social benefits like beautification of the city, good health of the residents and sanitation.                                                                                                                                             | not mentioned but the tree project was launched with the idea to fight climate change and foster urban resilience.                                                                                                              | <a href="https://www.switsalone.com/30799_sierra-leone-freetown-city-council-launches-tree-planting-initiative/">https://www.switsalone.com/30799_sierra-leone-freetown-city-council-launches-tree-planting-initiative/</a>                                                                                                                                                                                |



|              |                               |                                                  |                                                                                    |                       |                                                                                                                                                                                                                             |                                                                             |                                                  |                                                                                                                                                                                                               |                                                                                                                                                                                      |                                                                                                                                                                                                                                                                                                                                                                                 |
|--------------|-------------------------------|--------------------------------------------------|------------------------------------------------------------------------------------|-----------------------|-----------------------------------------------------------------------------------------------------------------------------------------------------------------------------------------------------------------------------|-----------------------------------------------------------------------------|--------------------------------------------------|---------------------------------------------------------------------------------------------------------------------------------------------------------------------------------------------------------------|--------------------------------------------------------------------------------------------------------------------------------------------------------------------------------------|---------------------------------------------------------------------------------------------------------------------------------------------------------------------------------------------------------------------------------------------------------------------------------------------------------------------------------------------------------------------------------|
|              |                               |                                                  |                                                                                    |                       | developing areas in Soweto.<br>- To mark Madiba's 90th birthday celebrations during the Arbor Day.                                                                                                                          |                                                                             |                                                  | in the township of Soweto. Thus, boosting socioeconomic impacts for citizens.                                                                                                                                 | the city's administration                                                                                                                                                            | <a href="#">tree-in-Soweto-during-Arbor-Week.aspx</a>                                                                                                                                                                                                                                                                                                                           |
| South Africa | Riverside View<br>Funds: n.a. | -2,000 trees (2019).                             | indigenous trees                                                                   | Riverside View / 2019 | 2,000 trees were planted in 2 hours by the JCPZ, in Riverside View in celebration of the arbor's month of 2019. The planting project is a public-private partnership between JCPZ and residential developers Valumax Group. | Not mentioned but the planting process was supervised.                      | Johannesburg City Parks and Zoo (JCPZ)           | This tree project will contribute to provide shade to people during hot days with their potential green leaves and absorbing carbon dioxide and releasing oxygen to provide a cleaner, healthier environment. | Unspecified but the carbon absorption was envisaged as a plausible effect of this project.                                                                                           | <a href="https://www.joburg.org.za/media/_Newsroom/Pages/2019%20Newsroom%20Articles/September%202019/City-Parks%E2%80%99-plants-2-000-trees-in-two-hours.aspx">https://www.joburg.org.za/media/_Newsroom/Pages/2019%20Newsroom%20Articles/September%202019/City-Parks%E2%80%99-plants-2-000-trees-in-two-hours.aspx</a>                                                         |
| South Africa | Gamka Park<br>Funds: n.a.     | 200 trees planted and 5,000 trees to be planted. | 1-Indigenous tree species.<br>2- Fruit trees species (peaches, apple, and citrus). | Riverlea / 2020       | This project is to bridge the green divide in the city and to tackle the growing concerns of the ageing tree canopy that has been adversely affected by pests, urbanization, weather, and illegal logging.                  | Not mentioned but the planting process is supervised by city administration | JCPZ Mayoral Committee for Community Development | 1. Socio-economic benefits are expected. 2. Increased education and food security are expected. 3. Job provision and increased revenue for the vulnerable community.                                          | 1. About 307,208 tons carbon dioxide (CO2) are expected since its initiation with the 2010 World Cup. 2. Around 42,000 tons CO2 equivalent was established as a natural carbon sink. | <a href="http://www.durban.gov.za/City_Services/development_planning_management/environmental_planning_climate_protection/Projects/Pages/Bufferlands-Community-Reforestation-Project.aspx">http://www.durban.gov.za/City_Services/development_planning_management/environmental_planning_climate_protection/Projects/Pages/Bufferlands-Community-Reforestation-Project.aspx</a> |
| South Africa | Cape Town<br>Funds: n.a.      | 210 mature trees planted.                        | Hardy Trees Species                                                                | Cape Town / 2010      | To beautify the city starting from the airport                                                                                                                                                                              | No tracking policies but the project is                                     | Trees SA Cape Town City                          | Beautification of the city and raise revenue from                                                                                                                                                             | Unspecified but for sure CO2 will be                                                                                                                                                 | <a href="https://www.trees-sa.co.za/2020/08/10/sali-bronze-cape-">https://www.trees-sa.co.za/2020/08/10/sali-bronze-cape-</a>                                                                                                                                                                                                                                                   |

|              |                                                                                            |                                                                                         |                                                    |                            |                                                                                                                                     |                                                                                            |                                                                                                     |                                                                                                                                                                                                        |                                                                                                                                          |                                                                                                                                                                                                                                                                                                                                                      |
|--------------|--------------------------------------------------------------------------------------------|-----------------------------------------------------------------------------------------|----------------------------------------------------|----------------------------|-------------------------------------------------------------------------------------------------------------------------------------|--------------------------------------------------------------------------------------------|-----------------------------------------------------------------------------------------------------|--------------------------------------------------------------------------------------------------------------------------------------------------------------------------------------------------------|------------------------------------------------------------------------------------------------------------------------------------------|------------------------------------------------------------------------------------------------------------------------------------------------------------------------------------------------------------------------------------------------------------------------------------------------------------------------------------------------------|
|              |                                                                                            |                                                                                         |                                                    |                            | which is considered by the responsible agencies as the first impression of the city.                                                | supervised by the responsible agency Trees SA.                                             | South African authority                                                                             | tourism produced by the World Cup 2010.                                                                                                                                                                | sequestered through this project.                                                                                                        | <a href="http://town-international-airport/">town-international-airport/</a>                                                                                                                                                                                                                                                                         |
| South Africa | Cape Town Authority<br><br>Funds: n.a.                                                     | 15,523 trees planted in 358 beneficiary sites                                           | Not available                                      | Cape Town / 2010-2017      | To address the greening disparities between leafy, privileged areas and barren under-privileged areas.                              | No tracking policies but the project is supervised by the responsible agencies.            | Cape Town City Authority.<br>Green pop organization<br>CEO Water Mandate                            | 1. Boost income activities for youths through this tree project<br>2. Planting green spaces to reduce socioeconomic inequalities in the city.                                                          | CO2 not mentioned but the project's aim is to help people adapt to climate change                                                        | <a href="https://greenpop.org/trees-for-cape-town/">https://greenpop.org/trees-for-cape-town/</a>                                                                                                                                                                                                                                                    |
| South Africa | 1. Durban City<br>2. South African authority<br>3. One Tree Planted NGO<br><br>Funds: n.a. | 10,000 trees were planted                                                               | 1-Indigenous tree species<br>2. Other tree species | Durban / 2019              | This project was initiated in line with the South Africa's FIFA World Cup 2010 to green cities and achieve offset carbon emissions. | Not mentioned but the planting process is supervised by the One Tree Planted organization. | One Tree Planted organization.<br>Durban City.<br>South African authority                           | 1. Approximately 100 full-time jobs have been created, plus an additional 524 part-time and temporary positions.<br>2. Increased food security and supplies for the community.<br>3. Poverty reduction | 1. Around 42,000 tons CO2 equivalent was established as a natural carbon sink. (to be sequestered over the next 20 years)                | <a href="https://onetreeplanted.org/blogs/stories/10000-trees-planted-south-africa">https://onetreeplanted.org/blogs/stories/10000-trees-planted-south-africa</a>                                                                                                                                                                                    |
| South Africa | South African government.<br><br>Funds: n.a.                                               | 10 million trees are expected to be planted in the next five years.                     | Not available                                      | uMhlathuze city/ 2021-2026 | -National Arbor Day initiated this tree project nationwide starting from Rayban.<br>-To combat climate change and global warming    | No tracking policies but the project is supervised by the responsible agencies.            | -The Deputy Minister of Forestry, Fisheries and the Environment.<br>-uMhlathuze Local Municipality. | Improve the socio-environmental conditions of the population and boost the green economy of the country.                                                                                               | Even though the amount of CO2 sequester is unstated. The project's aim is to help people adapt to climate change through trees planting. | <a href="https://www.environment.gov.za/event/deptactivity/dffeministry_arbormonth2021">https://www.environment.gov.za/event/deptactivity/dffeministry_arbormonth2021</a><br><a href="https://www.environment.gov.za/media/2021/04/diarelease/sotyua_bourmonth2021">https://www.environment.gov.za/media/2021/04/diarelease/sotyua_bourmonth2021</a> |
| Sudan        | Sudanese government<br>Funds: n.a.                                                         | Number of treesplanted not mentioned. But about 164 ha of trees expected to be planted. | Not available                                      | Khartoum / 2018            | -To fight deforestation by reafforestation of the urban forest reserve.                                                             | No tracking policies but the project is supervised by the responsible agencies.            | -Environmental Council of the State of Khartoum.<br>-Forests National Corporation (FNC)             | Planting trees in this forest reserve will improve the socioenvironmental conditions of people as this is one of the                                                                                   | Not specified but CO2 sequestration is part of the benefits of conserving this                                                           | <a href="https://www.nilebasindiscourse.org/news-blog/community-blog/136-sudan/342-sunut-forest-%20a-">https://www.nilebasindiscourse.org/news-blog/community-blog/136-sudan/342-sunut-forest-%20a-</a>                                                                                                                                              |

|          |                                                                           |                                                                |                         |                                                                                                                         |                                                                                                                                                      |                                                                                                   |                                                                                  |                                                                                                                                                                            |                                                                                                                |                                                                                                                                                                                                                                                                                                                                                                                                                        |
|----------|---------------------------------------------------------------------------|----------------------------------------------------------------|-------------------------|-------------------------------------------------------------------------------------------------------------------------|------------------------------------------------------------------------------------------------------------------------------------------------------|---------------------------------------------------------------------------------------------------|----------------------------------------------------------------------------------|----------------------------------------------------------------------------------------------------------------------------------------------------------------------------|----------------------------------------------------------------------------------------------------------------|------------------------------------------------------------------------------------------------------------------------------------------------------------------------------------------------------------------------------------------------------------------------------------------------------------------------------------------------------------------------------------------------------------------------|
|          |                                                                           |                                                                |                         |                                                                                                                         | - To fight climate change and global warming.<br>- Make the urban forest attractive for tourists.                                                    |                                                                                                   | - Sudanese Environment Conservation Society (SECS).                              | few remaining urban forest in Sudan.                                                                                                                                       | urban forest reserve.                                                                                          | <a href="https://www.un.org/africarenewal/news/restoring-sudan%E2%80%99s-forest-cover-one-tree-time">sudanese-urban-forest-reserve-and-bird-sanctuary-under-threat%20.html</a>                                                                                                                                                                                                                                         |
| Sudan    | UNHCR<br>Funds: n. a.                                                     | 1 million trees planted.                                       | Acacia trees            | White Nile state / 2017-2020                                                                                            | 1- Combat deforestation<br>2- Semi-arid climate with temperature increases of 48 Celsius.<br>3-Improve cultivation conditions.                       | No policies implemented but the responsible agents will supervise trees planting growth.          | 1- Forests National Corporation (FNC)<br>2- UNHCR<br>3- Norwegian government     | 1. Job creation for locals and refugees.<br>2. Create social ties between locals and refugees through trees planting.<br>3. Teaching environmental awareness.              | n.a. but the project aims to reduce carbon emissions.                                                          | <a href="https://www.un.org/africarenewal/news/restoring-sudan%E2%80%99s-forest-cover-one-tree-time">https://www.un.org/africarenewal/news/restoring-sudan%E2%80%99s-forest-cover-one-tree-time</a><br><a href="https://www.unhcr.org/news/stories/2020/6/5edde8e54/restoring-sudans-forest-cover-tree-time.html">https://www.unhcr.org/news/stories/2020/6/5edde8e54/restoring-sudans-forest-cover-tree-time.html</a> |
| Sudan    | UNHCR<br>Funds: n.a.                                                      | 1 million trees planted in a refugee camp                      | Acacia trees            | Al Jabalain / 2017-2020                                                                                                 | 1-Combat deforestation.<br>2- Improve agricultural conditions                                                                                        | No tracking policies implemented but the responsible agents will supervise trees planting growth. | -Forests National Corporation (FNC).<br><br>-UNHCR<br><br>-Norwegian government  | 1-Job creation for locals and refugees.<br><br>2. Create social ties between locals and refugees through trees planting.                                                   | The project aimed to achieve carbon sequestration though CO2 offsets not stated.                               | <a href="https://www.unhcr.org/news/stories/2020/6/5edde8e54/restoring-sudans-forest-cover-tree-time.html">https://www.unhcr.org/news/stories/2020/6/5edde8e54/restoring-sudans-forest-cover-tree-time.html</a>                                                                                                                                                                                                        |
| Tanzania | 1- Tanzanian government<br>2-Raleigh Tanzania Society.<br><br>Funds: n.a. | 4,000 trees planted & 50 million trees expected to be planted. | Indigenous tree species | Dodoma, Arusha, Kilimanjaro, Manyara, Dar es Salaam, Morogoro, , Kagera, Geita, Mwanza and Mbeya and others / 2016-2020 | "50 million Trees for 50 million people" initiative is designed to encourage small efforts by every Tanzanian to tackle the impact of deforestation. | n.a. but the responsible agents will supervise trees planting growth.                             | - Raleigh Tanzania Society<br>- Tanzanian government,<br>- Ministry of Forestry. | Impacts are not mentioned but the targeted goal is to improve the living conditions of the residents of Dodoma by fighting climate change and desertification in the city. | n.a. but the project's aim is to mitigate climate change through reducing carbon emissions via trees planting. | <a href="https://raleighinternational.org/blog/blog_post/governments-pledges-trees-life-tanzanian-children-response-call-action-national-youth/">https://raleighinternational.org/blog/blog_post/governments-pledges-trees-life-tanzanian-children-response-call-action-national-youth/</a>                                                                                                                            |
| Tanzania | Tanzania Agricultural Development Bank (TADB)<br><br>Funds: n. a.         | 4000 trees were expected to be planted.                        | n.a.                    | Dodoma /2021                                                                                                            | -To make the city more attractive for green business and tourism.                                                                                    | No tracking policies implemented but the responsible agents will                                  | Dodoma authorities                                                               | 1. Boosting economic and agricultural activities through a sustainable                                                                                                     | The project aims to achieve carbon sequestration to fight climate change even                                  | <a href="https://www.africa-pers.net/tanzania/all-news/tadb-to-plant-4000-trees-">https://www.africa-pers.net/tanzania/all-news/tadb-to-plant-4000-trees-</a>                                                                                                                                                                                                                                                          |

|          |                                                                                                                                              |                                                                                           |                                        |                                    |                                                                                                                        |                                                                                                   |                                                                                                                                                        |                                                                                                                                         |                                                                                            |                                                                                                                                                                                                                                                                                                                   |
|----------|----------------------------------------------------------------------------------------------------------------------------------------------|-------------------------------------------------------------------------------------------|----------------------------------------|------------------------------------|------------------------------------------------------------------------------------------------------------------------|---------------------------------------------------------------------------------------------------|--------------------------------------------------------------------------------------------------------------------------------------------------------|-----------------------------------------------------------------------------------------------------------------------------------------|--------------------------------------------------------------------------------------------|-------------------------------------------------------------------------------------------------------------------------------------------------------------------------------------------------------------------------------------------------------------------------------------------------------------------|
|          |                                                                                                                                              |                                                                                           |                                        |                                    | - Agricultural and economic development cannot be achieved if there isn't sustainable conservation of the environment. | supervise trees planting growth                                                                   |                                                                                                                                                        | conservation of the environment                                                                                                         | though the CO2 sequestration is not mentioned.                                             | <a href="#">to-make-dodoma-green</a>                                                                                                                                                                                                                                                                              |
| Tanzania | Investor not stated<br>Fund: n.a.                                                                                                            | Number of trees not mentioned.                                                            | cashew nuts, mangoes, sisal and grapes | Dodoma / 2020                      | For commercial purposes through planting of fruit trees like mango, cashew nuts and others                             | Tracking policies are not stated but the supervision is done by responsible agencies.             | Tanzania Forest Service<br>WWF<br>Vodacom<br>Tanzania Foundation                                                                                       | 1- Improve socioeconomic conditions of its residents.<br>2- The green city of Dodoma will attract tourists.                             | not mentioned                                                                              | <a href="https://allafrica.com/stories/202012290270.html">https://allafrica.com/stories/202012290270.html</a>                                                                                                                                                                                                     |
| Togo     | Togolese Government<br>Funds: n.a.                                                                                                           | 50,000 trees planted during the national arbor day                                        | n.a.                                   | Lome / 2020                        | Raising awareness of the population about the protection of the environment and the restoration of forest ecosystem.   | No tracking policies implemented but the responsible agents will supervise trees planting growth. | Minister of Environment, Sustainable Development and Protection of Nature.<br>Togolese Presidency                                                      | To address the greening disparities between leafy, privileged areas and barren under-privileged areas.                                  | CO2 sequestration is highly ambitious, but no amount stated in this tree planting project. | <a href="https://www.republiquetogolaise.com/agro/3105-4370-message-du-ministre-de-l-environnement-a-l-occasion-de-la-celebration-de-la-journee-de-l-arbre">https://www.republiquetogolaise.com/agro/3105-4370-message-du-ministre-de-l-environnement-a-l-occasion-de-la-celebration-de-la-journee-de-l-arbre</a> |
| Tunisia  | Forestry Department of the Regional Commission for Agricultural Development in Tunis<br>Funds: 200,000 Tunisian dinars (nearly 60,000 euros) | 3 hectares of trees                                                                       | n.a.                                   | El Agba (Tunis) / 2018-2019        | To fight climate change and urban heat waves. Reduce droughts and desertification.                                     | n.a. but responsible agents will supervise trees planting growth.                                 | Forestry Department of the Regional Commission for Agricultural Development of Tunis (CRDA)<br>Minister of Agriculture, Water Resources and Fisheries. | The forest also has a wellness trail that will benefit 300,000 residents. Improve the health of the environment through trees planting. | Carbon sequestration is not mentioned but it is a target.                                  | <a href="https://www.afrik21.africa/en/tunisia-crda-inaugurates-urban-forest-in-central-tunis/">https://www.afrik21.africa/en/tunisia-crda-inaugurates-urban-forest-in-central-tunis/</a>                                                                                                                         |
| Tunisia  | Tunisian government.<br>Funds: n.a.                                                                                                          | 2 million trees will be planted in the areas mostly affected by fires in the summer 2021. | n.a.                                   | Kasserine and Jendouba / 2021-2022 | Reforestation of the burnt forest areas particularly in Kasserine and Jendouba.                                        | Tracking policies not mentioned but supervision is done by responsible agents.                    | The General Directorate of Forests.<br>Ministry of Agriculture,                                                                                        | 1. To improve socioenvironmental conditions of the population.<br>2. Making these cities attractive by                                  | CO2 sequestration is highly targeted, but no amount is stated.                             | <a href="https://lapresse.tn/108919/la-tunisie-sapprete-a-planter-2-millions-darbres-dans-les-zones-les">https://lapresse.tn/108919/la-tunisie-sapprete-a-planter-2-millions-darbres-dans-les-zones-les</a>                                                                                                       |

|                       |                                                                                            |                                                                                                                                            |                                                                |                                                                          |                                                                                                                                                                                                   |                                                                          |                                                                                                                                                      |                                                                                                                                                                                                                                               |                                                                       |                                                                                                                                                                                                                                                                                                                                                                                                                                                                                                                                                                      |
|-----------------------|--------------------------------------------------------------------------------------------|--------------------------------------------------------------------------------------------------------------------------------------------|----------------------------------------------------------------|--------------------------------------------------------------------------|---------------------------------------------------------------------------------------------------------------------------------------------------------------------------------------------------|--------------------------------------------------------------------------|------------------------------------------------------------------------------------------------------------------------------------------------------|-----------------------------------------------------------------------------------------------------------------------------------------------------------------------------------------------------------------------------------------------|-----------------------------------------------------------------------|----------------------------------------------------------------------------------------------------------------------------------------------------------------------------------------------------------------------------------------------------------------------------------------------------------------------------------------------------------------------------------------------------------------------------------------------------------------------------------------------------------------------------------------------------------------------|
|                       |                                                                                            |                                                                                                                                            |                                                                |                                                                          |                                                                                                                                                                                                   |                                                                          | Water Resources and Fisheries Observatory. National Agriculture Council (ONAGRI)                                                                     | encouraging trees planting.                                                                                                                                                                                                                   |                                                                       | <a href="#">plus-touchees-par-les-incendies/</a>                                                                                                                                                                                                                                                                                                                                                                                                                                                                                                                     |
| Zambia                | The Zambian government<br><br>Funds: n.a.                                                  | 1 billion trees were expected to be planted out of 2 billion trees.                                                                        | n.a.                                                           | Chinsali / 2018-2021                                                     | The aim of planting 2 billion trees in 2021 is in line with the country's Seventh National Development Plan.                                                                                      | n.a. about tracking policies.                                            | -The Zambian government ministries: Higher Education Ministry, Ministry of Lands and Natural Resources, PAM,<br>- Dr. Kaunda-First Zambian President | Social impacts of this tree project are to transform the mindset of youths to be considered to begin to value the importance of planting trees as a tool for economic diversification.                                                        | n.a. but CO2 is the prime objective of this project.                  | <a href="https://reliefweb.int/report/zambia/leading-front-zambia-launches-plant-million-trees-initiative">https://reliefweb.int/report/zambia/leading-front-zambia-launches-plant-million-trees-initiative</a>                                                                                                                                                                                                                                                                                                                                                      |
| Zimbabwe              | Zimbabwean government.<br><br>Funds: n.a.<br><br>Zimbabwean government.<br><br>Funds: n.a. | 15 million trees expected to be planted.<br><br>Number of trees not mentioned but the project is greening the "Sunshine City"              | -indigenous tree species<br>- Fruit trees species.<br><br>n.a. | Starting from Harare to the nationwide / 2018-2019.<br><br>Harare / 2017 | -Encourage biodiversity and environmental protection<br>- Promote fruit trees nationwide.<br><br>Solve land pressures for residential stands developments.<br><br>Reduce rural to urban migration | No tracking policies stated supervised by the responsible agencies.      | - Ministry of Environment and Forestry<br>- Forestry Commission.<br><br>City Council                                                                 | - Food security<br>- Job creation and economic booster<br>- Environmental protection and biodiversity conservation.<br><br>Improve health conditions of people and city's environment.<br>Improve the socioeconomic conditions of the people. | CO2 sequestration is a targeted goal although no amount is mentioned. | <a href="https://www.herald.co.zw/national-tree-planting-day-2/#:~:text=LAST%20UPDATE-,National%20tree%20planting%20day,planting%20season%20is%20officially%20launched.">https://www.herald.co.zw/national-tree-planting-day-2/#:~:text=LAST%20UPDATE-,National%20tree%20planting%20day,planting%20season%20is%20officially%20launched.</a><br><br><a href="https://panafricanvisions.com/2017/07/harare-city-aimsto-reclaim-lost-glory-greening-initiatives/">https://panafricanvisions.com/2017/07/harare-city-aimsto-reclaim-lost-glory-greening-initiatives/</a> |
| Ethiopia and Djibouti | Both countries<br><br>Funds: n.a.                                                          | Number of trees not expressed but this project is a tree-planting campaign along the railway "Green Addis Ababa-Djibouti, Green Ethiopia". | n.a.                                                           | Addis Ababa and Djibouti                                                 | The campaign reflected the concept of "green travel, green development" upheld by the Addis Ababa-Djibouti Railway,                                                                               | Policies not mentioned but the planting time will be January-March 2020. | No tracking policies but it is under supervision of Ethiopia, Djibouti, and China's governments.                                                     | 1- Improve the wellbeing of the population and particularly the travelers from Addis- Djibouti.<br>2- Improve the health conditions of travelers and environment.                                                                             | Carbon sequestration is a target though not mentioned.                | <a href="http://www.crecg.com/english/2691/2743/10080626/index.html">http://www.crecg.com/english/2691/2743/10080626/index.html</a>                                                                                                                                                                                                                                                                                                                                                                                                                                  |

**Figure S1: Map of Africa displaying the different tree planting projects.**

Source: Africa map created from the trees' research project database.

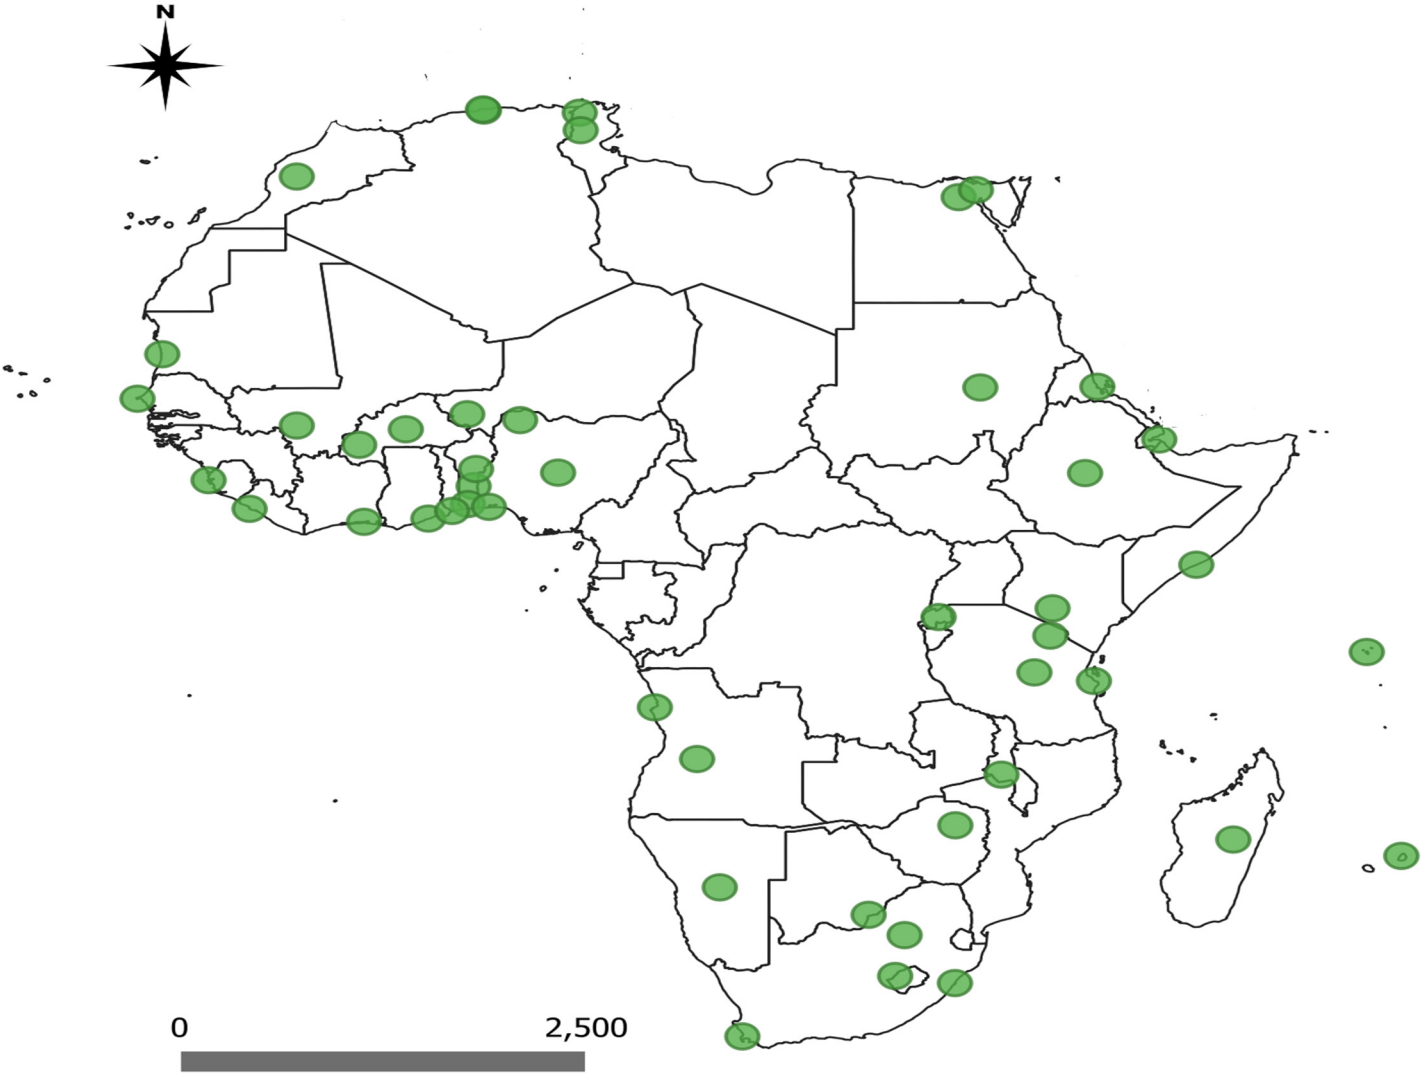

Supplement: s1 [file s1 › urbansci-1846778-supplementary.pdf]
